# Supplementary material for: Pregnant Mothers’ Medical Claims and Associated Risk of Their Children being Diagnosed with Autism Spectrum Disorder
Source: MDPI journal article supplement (doi:10.3390/jpm11100950), 2021-09-24
Supplement: s1 [file s1]

**Table S2.** Highly Correlated Variables

| Variable                                                 | Category          | P-value <sup>1</sup>         | r <sup>2</sup> value |
|----------------------------------------------------------|-------------------|------------------------------|----------------------|
| <b>Procedures Cardiovascular</b> <sup>3</sup>            | <b>Procedural</b> | <b>1.8 x 10<sup>-2</sup></b> | 0.95                 |
| Surgical Procedures Cardiovascular System                | Procedural        | 2.2 x 10 <sup>-2</sup>       |                      |
| Need for Prophylactic Vaccination against Viral Diseases | Diagnostic        | 6.5 x 10 <sup>-5</sup>       | 0.88                 |
| <b>Vaccinations</b> <sup>3</sup>                         | <b>Procedural</b> | <b>4.5 x 10<sup>-6</sup></b> |                      |
| Diagnostic Agents                                        | Pharmacy          | 1.8 x 10 <sup>-2</sup>       | 0.88                 |
| <b>Durable Medical Equipment Diabetic</b> <sup>3</sup>   | <b>Pharmacy</b>   | <b>2.8 x 10<sup>-3</sup></b> |                      |
| Immunization Administration for Vaccines Toxoids         | Procedural        | 1.3 x 10 <sup>-5</sup>       | 0.86                 |
| <b>Vaccinations</b> <sup>3</sup>                         | <b>Procedural</b> | <b>4.5 x 10<sup>-6</sup></b> |                      |
| Need for Prophylactic Vaccination against Viral Diseases | Procedural        | 6.5 x 10 <sup>-5</sup>       | 0.80                 |
| Immunization Administration for Vaccines Toxoids         | Diagnostic        | 1.3 x 10 <sup>-5</sup>       |                      |
| <b>Acquired Hypothyroidism</b> <sup>3</sup>              | <b>Pharmacy</b>   | <b>5.3 x 10<sup>-2</sup></b> | 0.80                 |
| Endocrine Thyroid Therapy                                | Diagnostic        | 1.8 x 10 <sup>-1</sup>       |                      |

<sup>1</sup> p-value was calculated using unadjusted logistic regression analysis.

<sup>2</sup> Pearson correlation coefficient.

<sup>3</sup> bolded variables are kept in the logistic regression analysis.
